# Supplementary material for: S/O/W Emulsion with CAPE Ameliorates DSS-Induced Colitis by Regulating NF-κB Pathway, Gut Microbiota and Fecal Metabolome in C57BL/6 Mice
Source: MDPI journal article supplement (doi:10.3390/nu16081145), 2024-04-12
Supplement: s1 [file s1]

Supplementary Figure S1

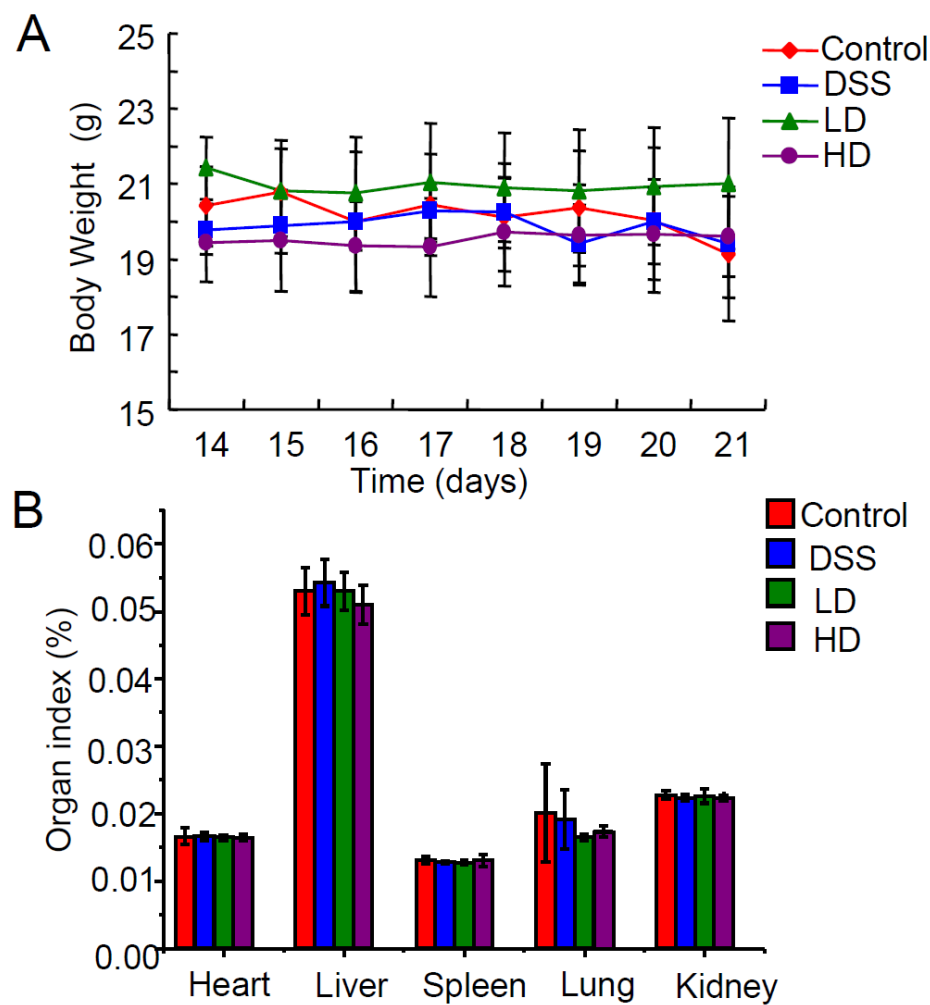

**Figure S1** Effect of the CAPE-emulsion on the body weight (A) and organ indices (B) of DSS-induced colitis mice.

Supplementary Figure S2

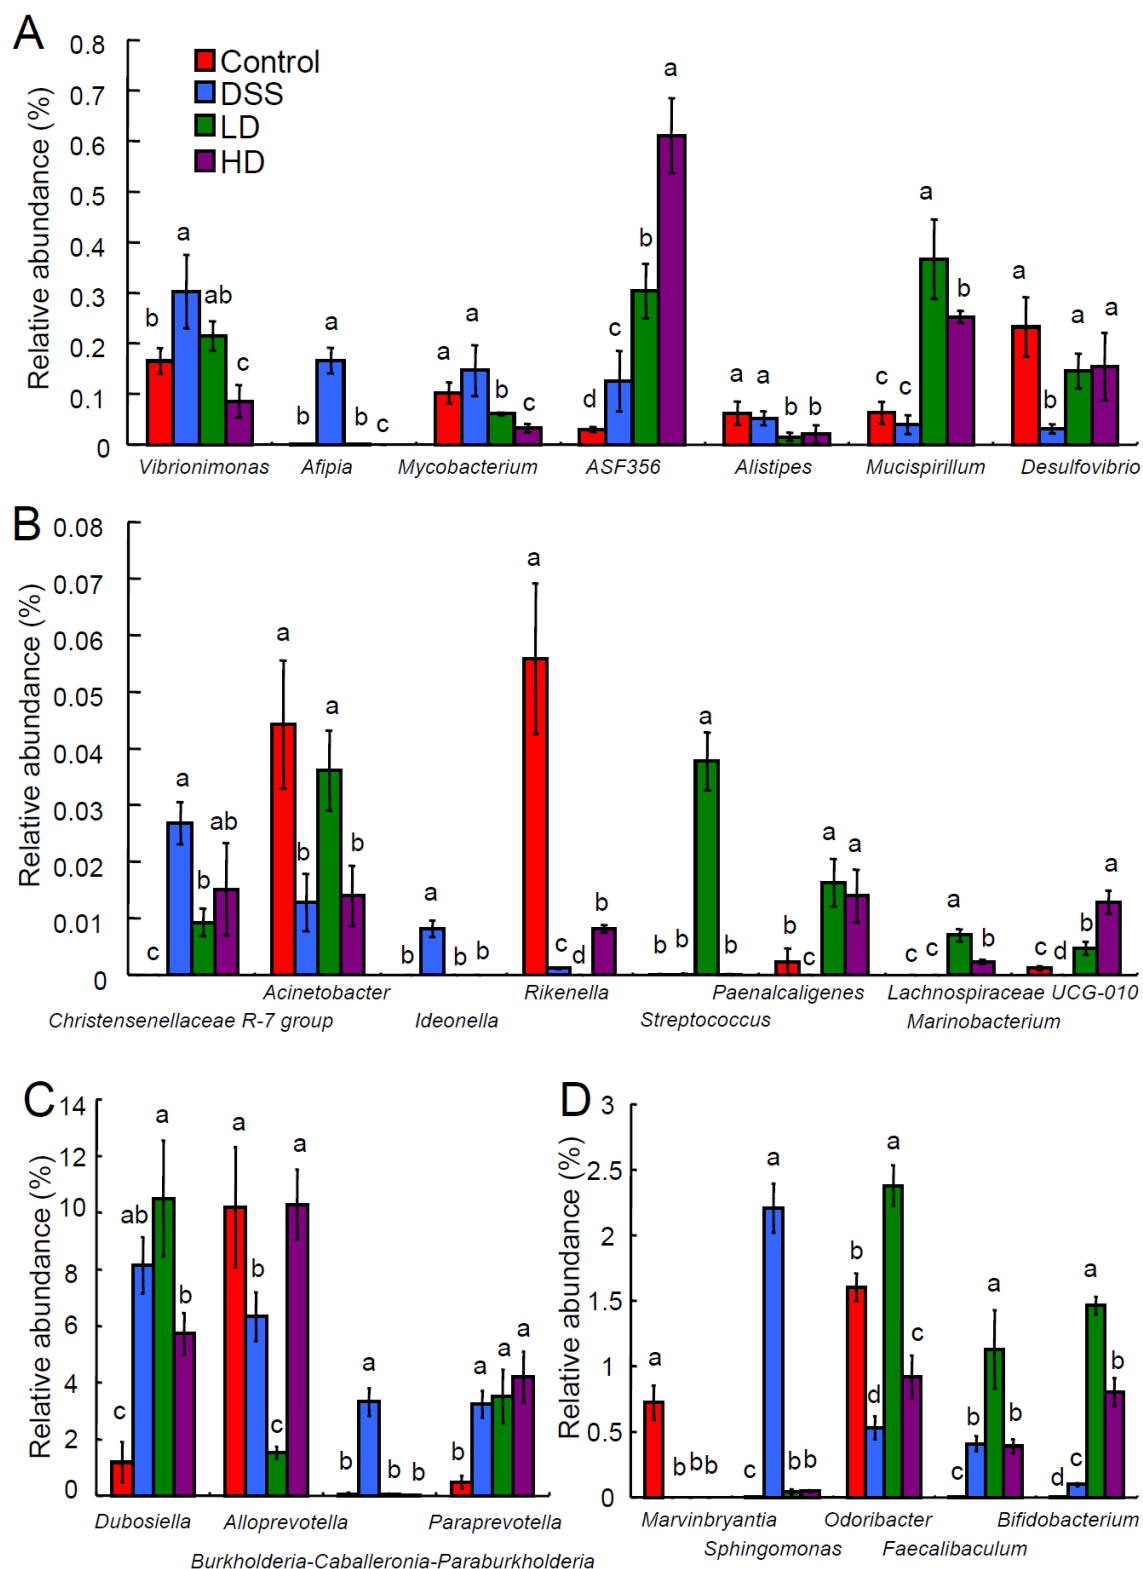

**Figure S2** Effect of the CAPE-emulsion on the relative abundance of the biomarkers by LefSe analysis in DSS-induced colitis mice. The data are expressed as the mean  $\pm$  SEM with different letters in the same genus indicating significant differences ( $P < 0.05$ ,  $n = 3$ ).
